# Supplementary material for: Cooperation between host immunity and the gut bacteria is essential for helminth-evoked suppression of colitis
Source: PubMed Central journal article supplement (PMC8438845; doi:10.1186/s40168-021-01146-2), 2021-09-13

Control

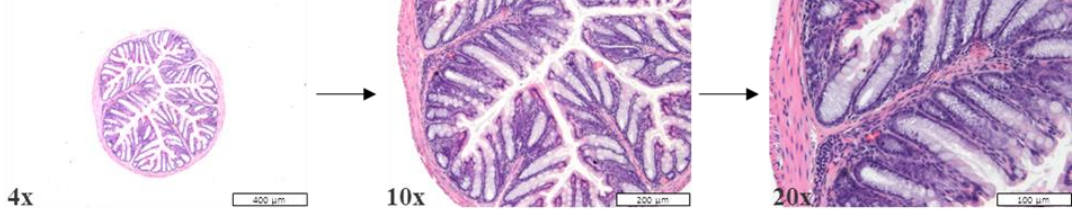

ABX

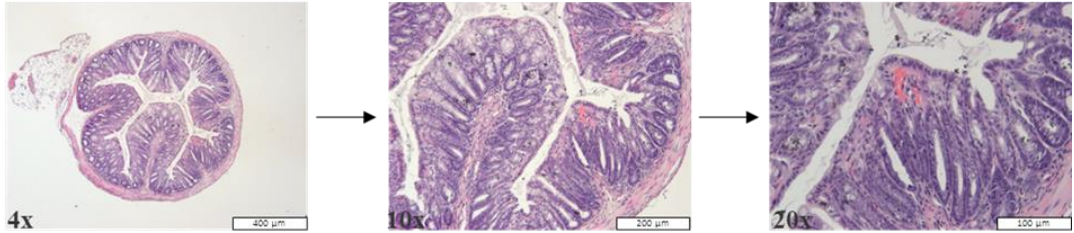

DNBS

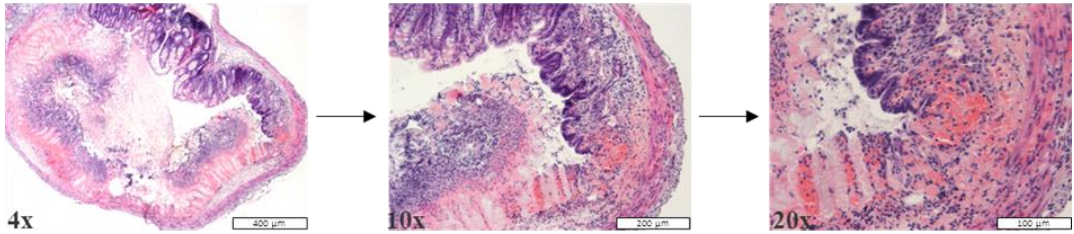

*H. diminuta* & DNBS

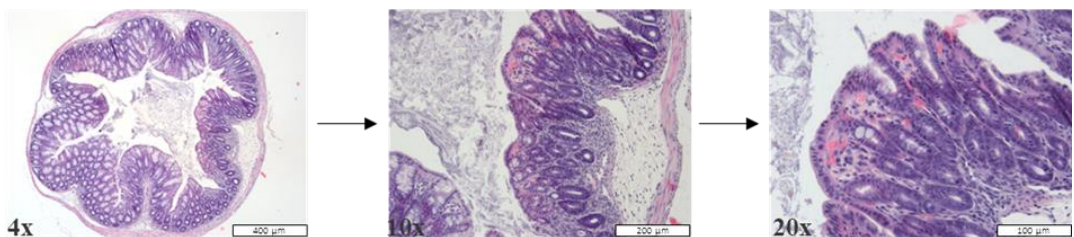

ABX & DNBS

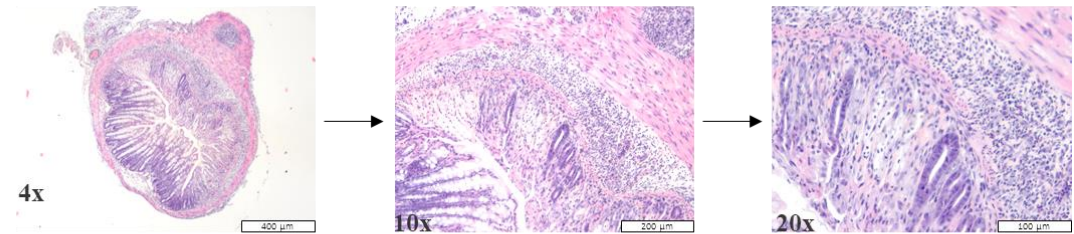

*H. diminuta* & ABX & DNBS

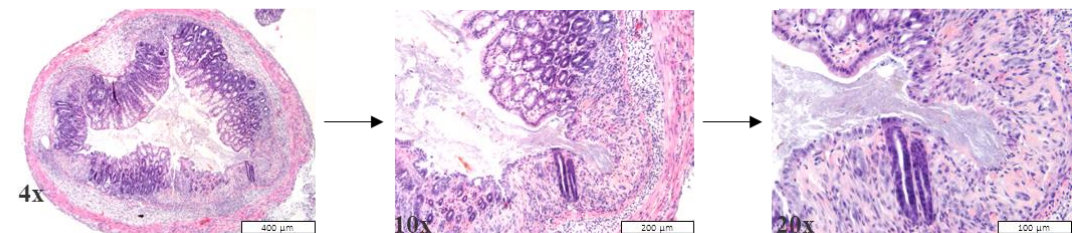

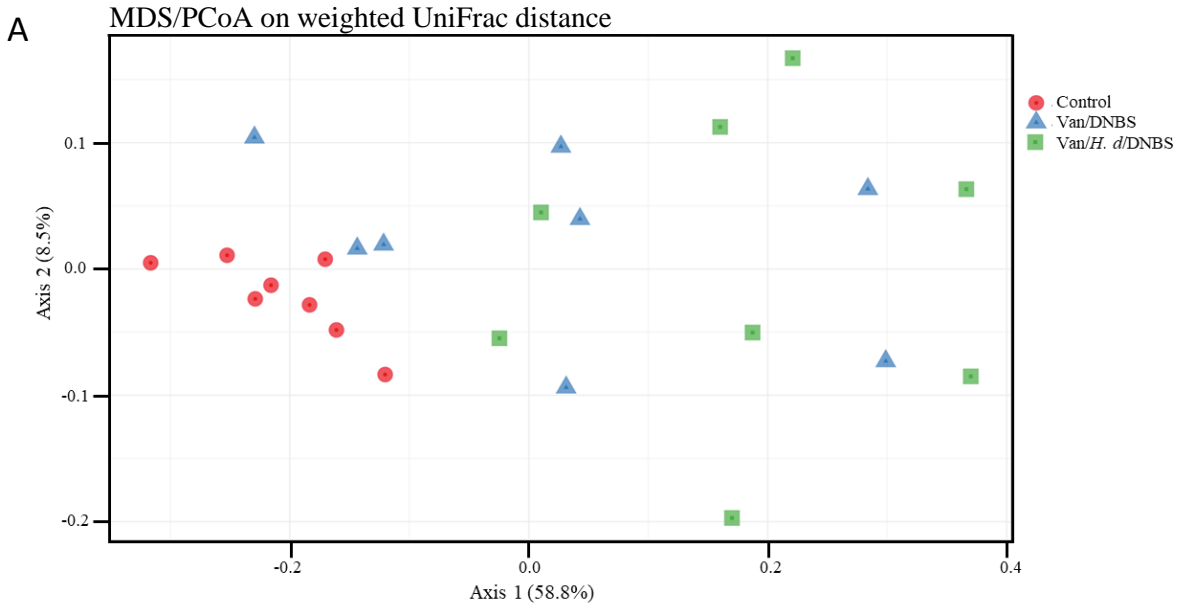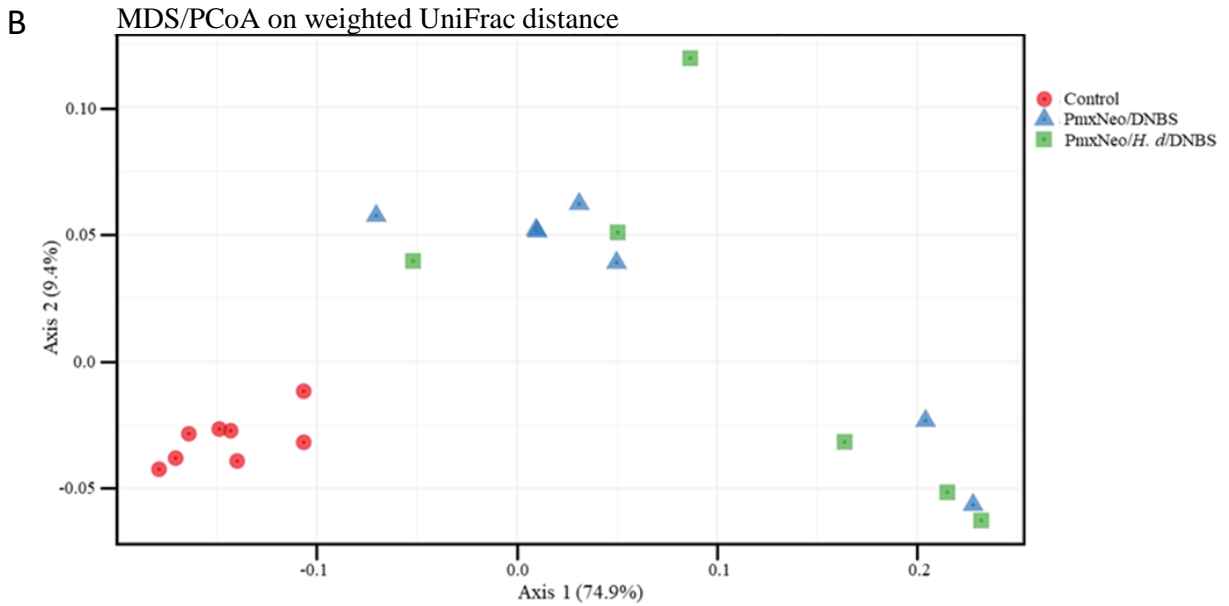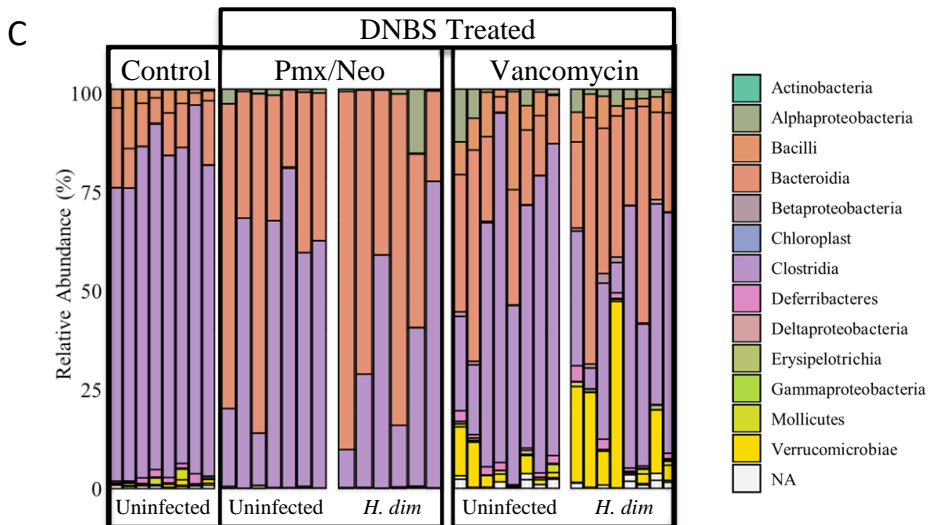

DeSeq2 Results: Comparing *H. dim*/DNBS against Van/*H. dim*/DNBS

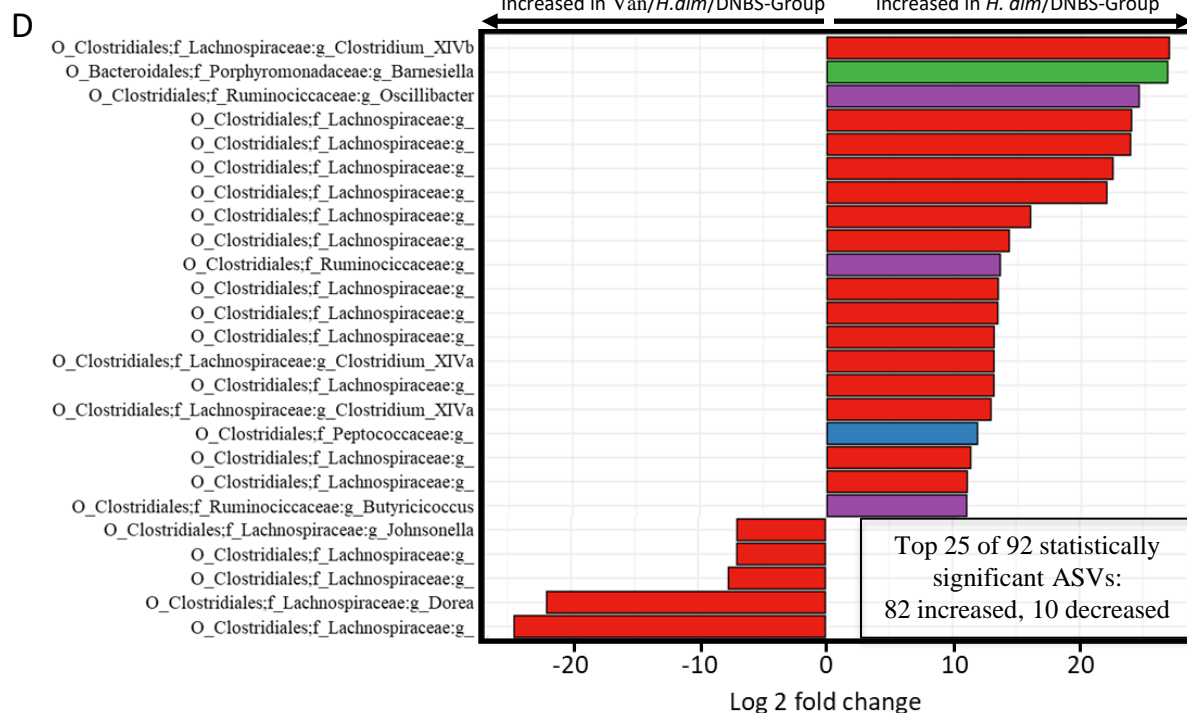

DeSeq2 Results: Comparing *H. dim*/DNBS against PmxNeo/*H. dim*/DNBS

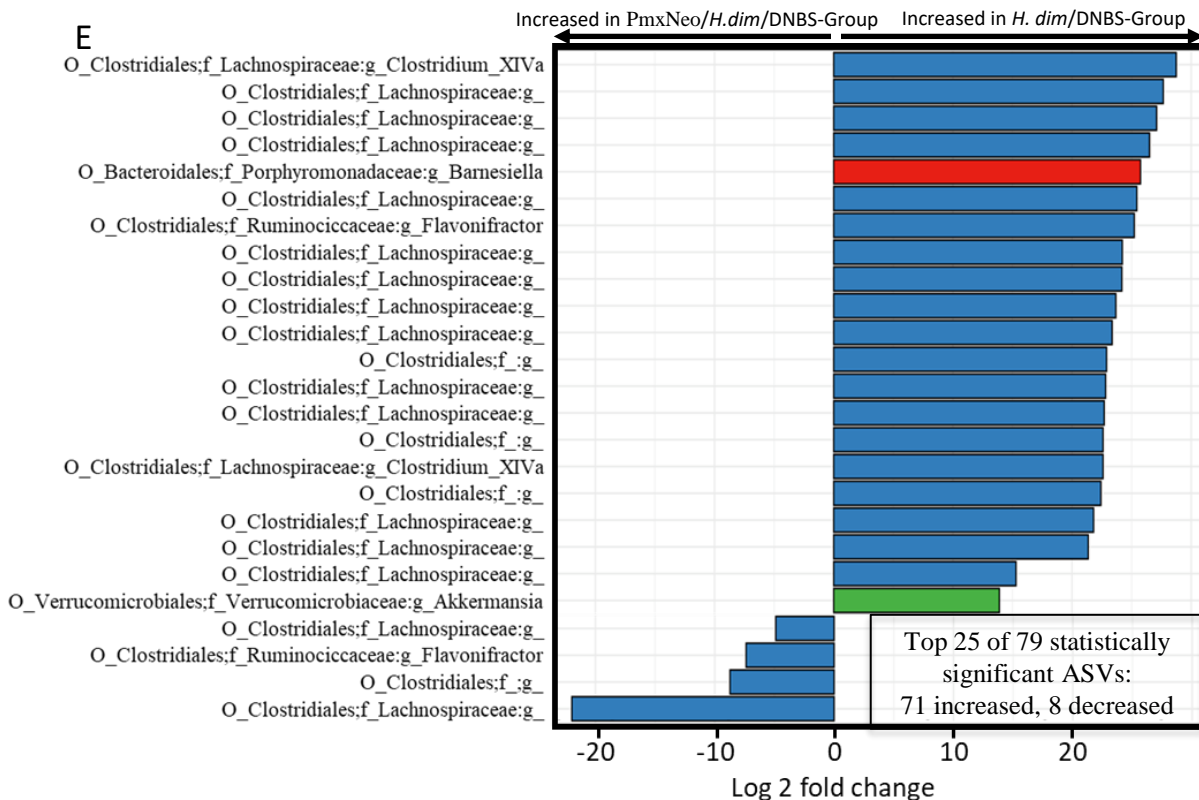

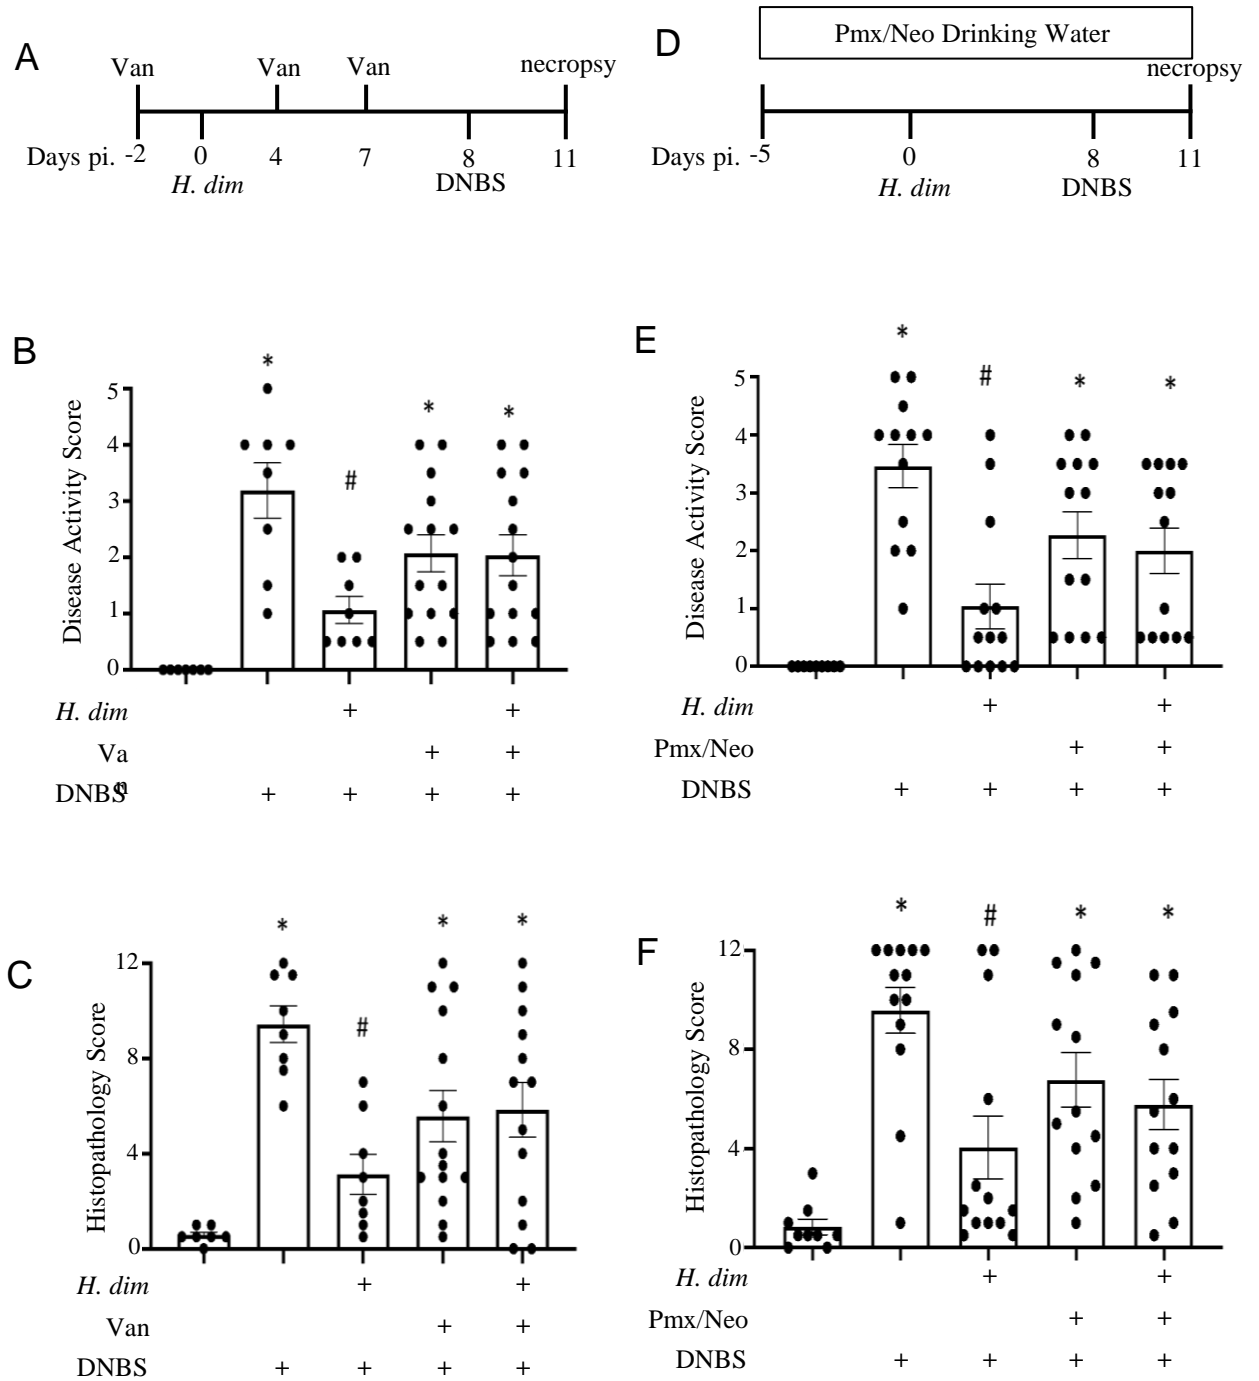

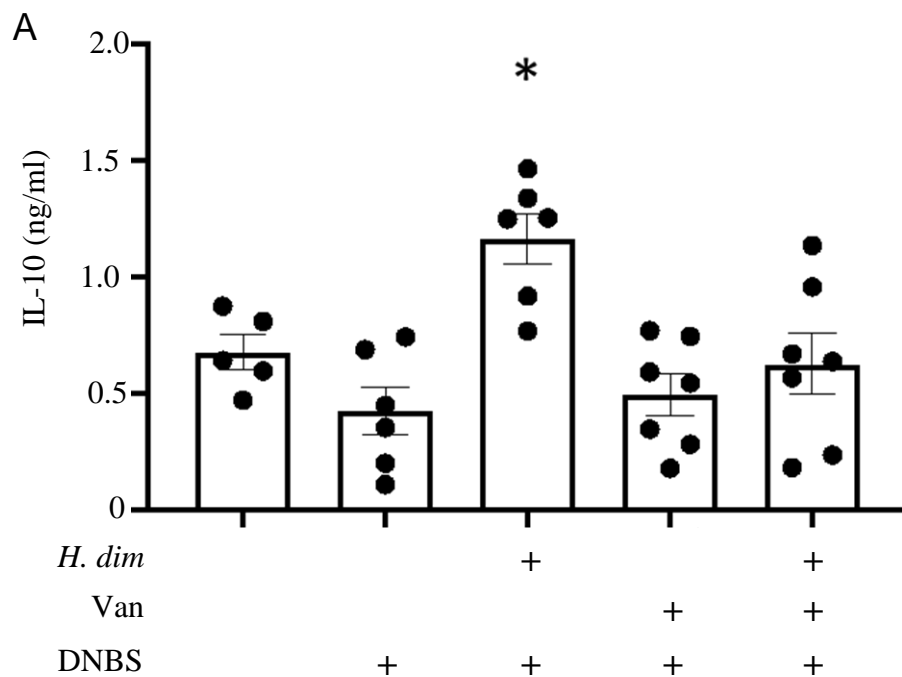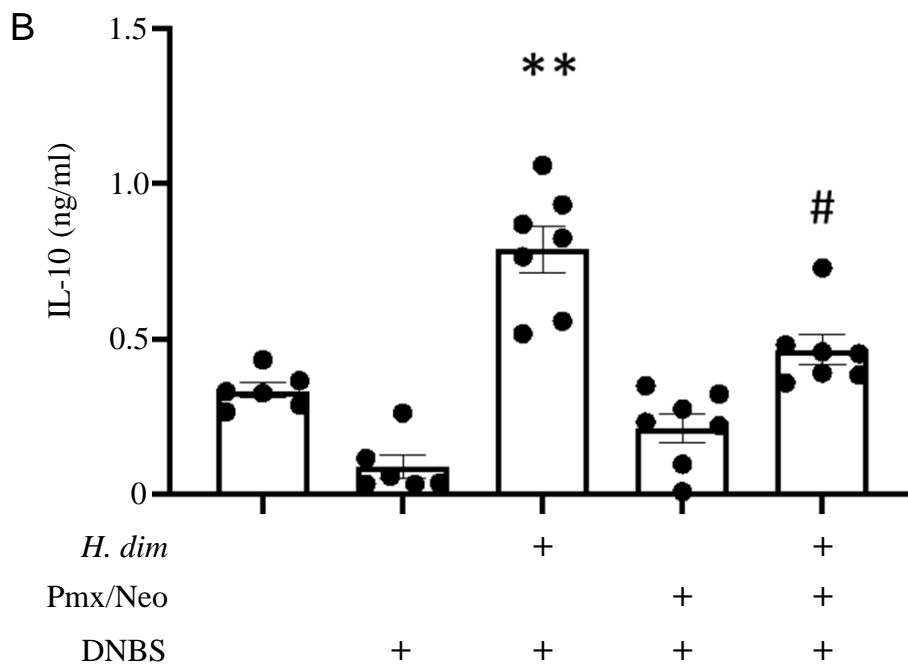

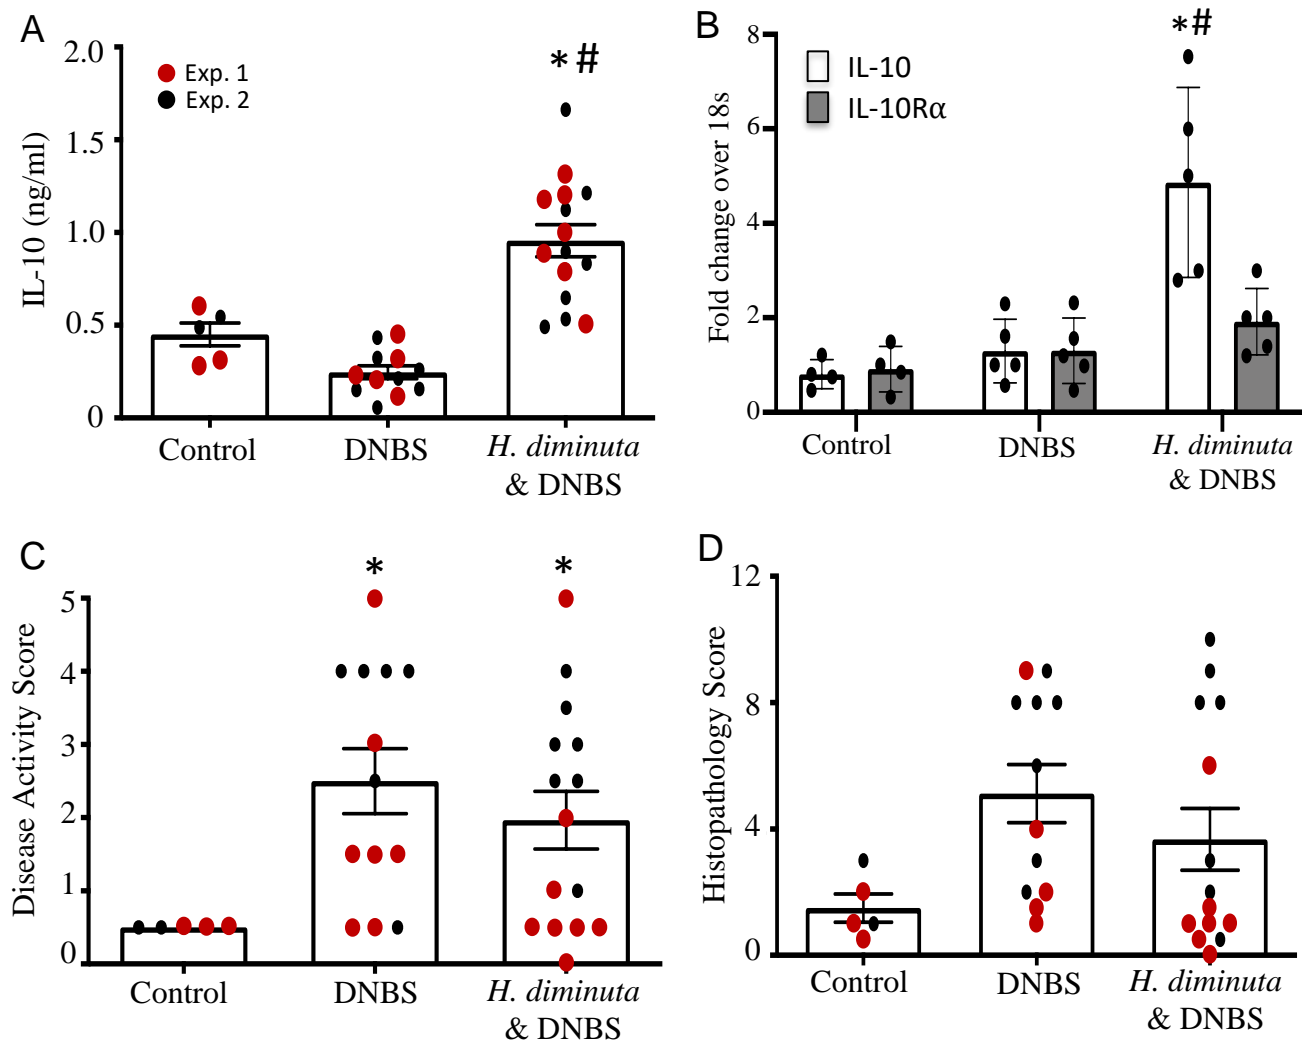

A

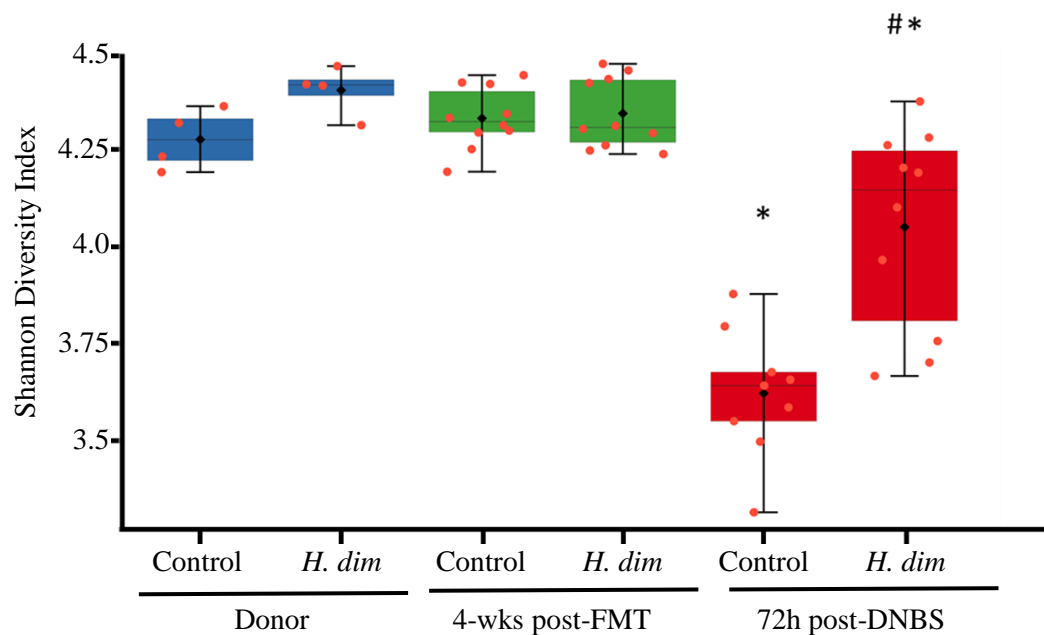

B

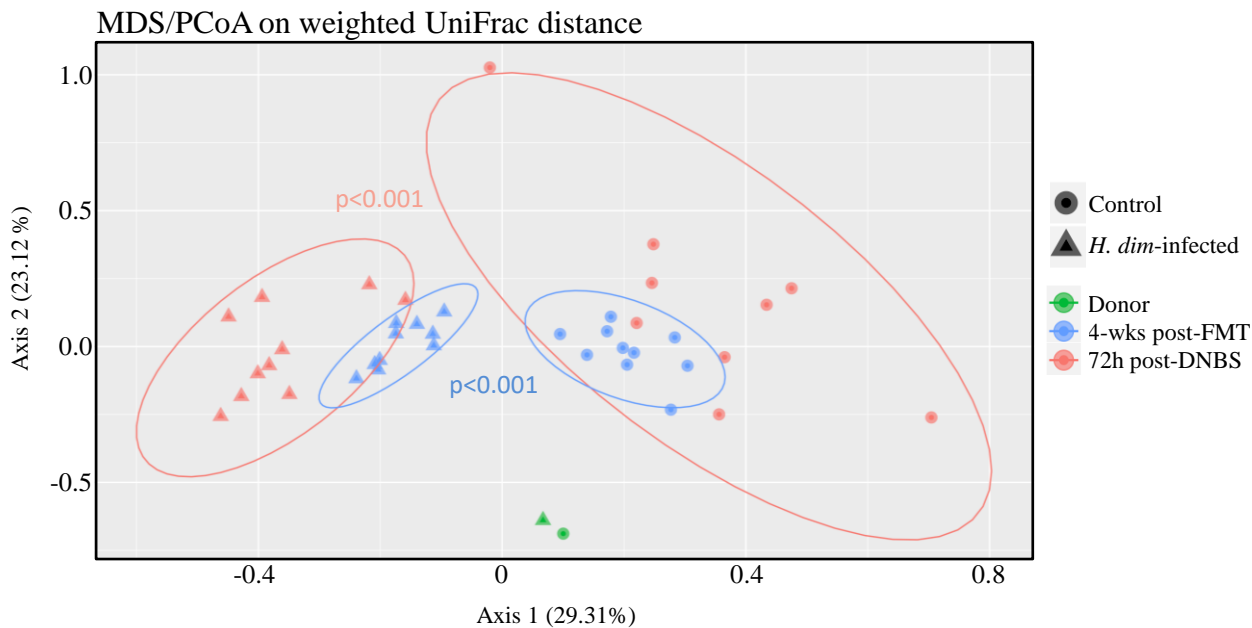

C

DeSeq2 Results: Comparing control donor against *H. diminuta* donor

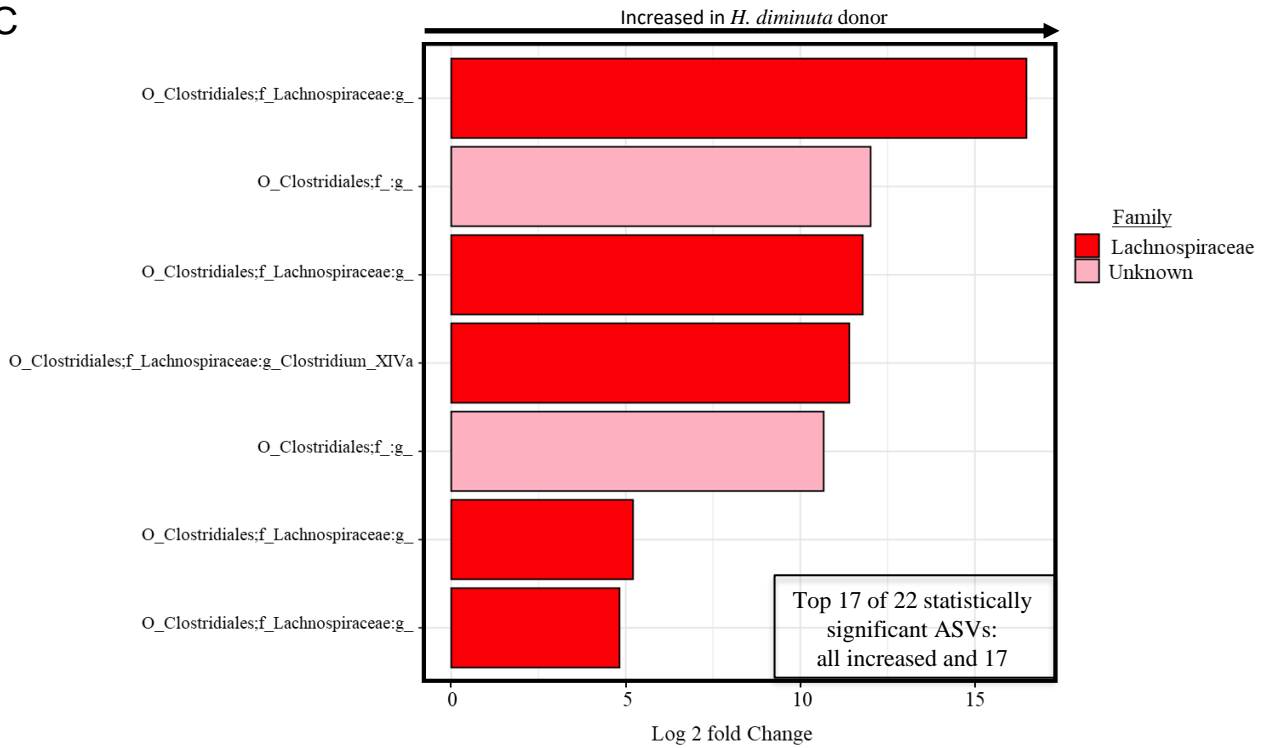

D

DeSeq2 Results: Comparing control post-transplant against *H. diminuta* post-transplant

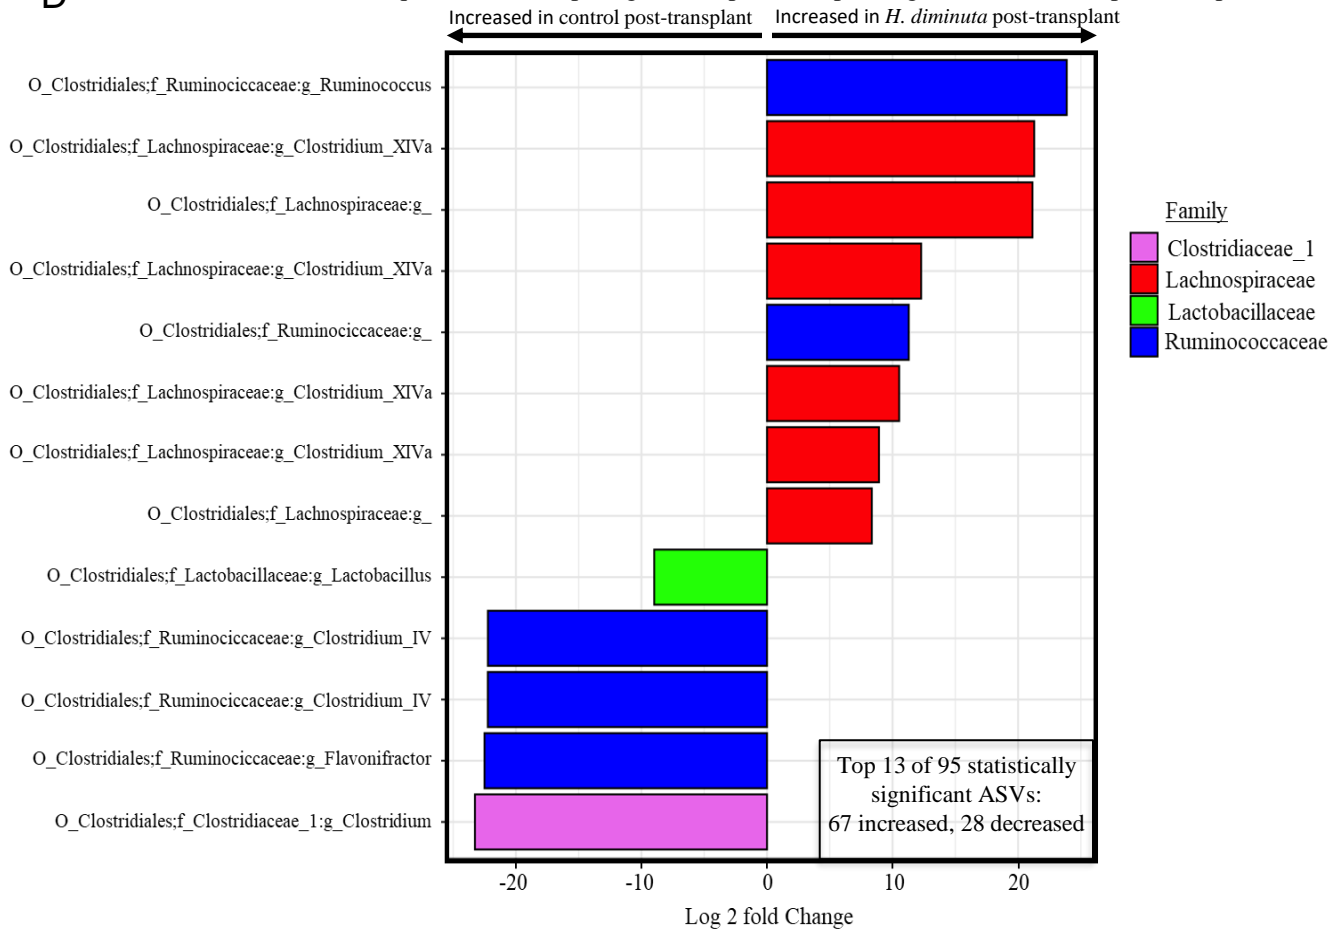



E

DeSeq2 Results: Comparing control post-DNBS against *H. diminuta* post-DNBS

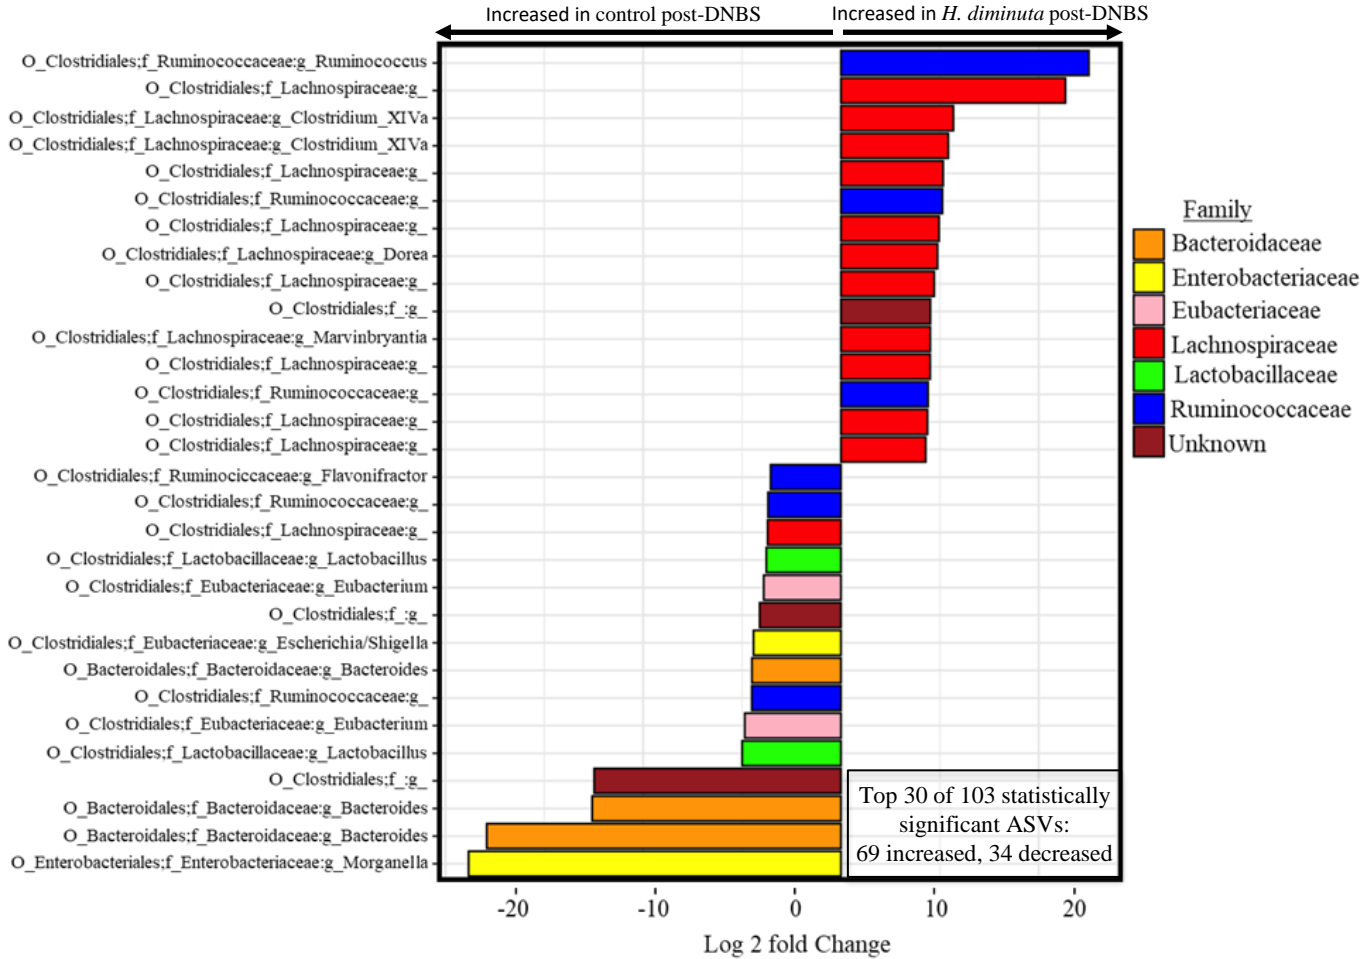

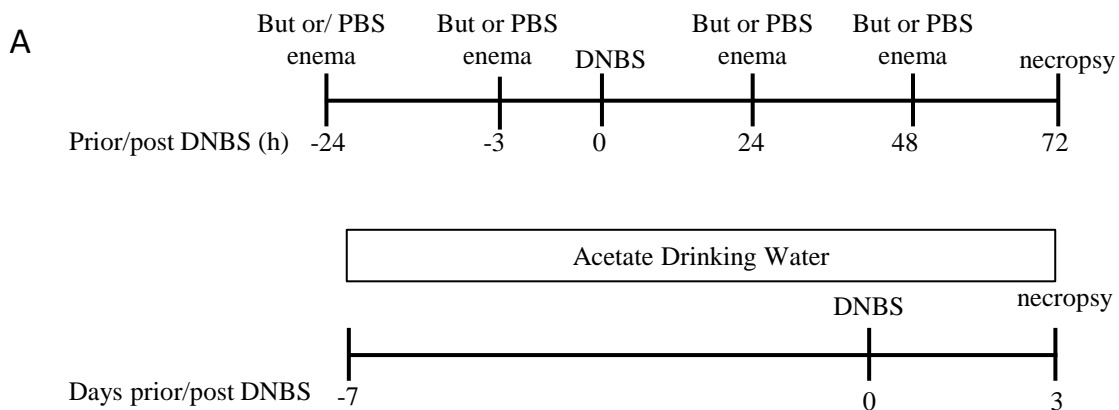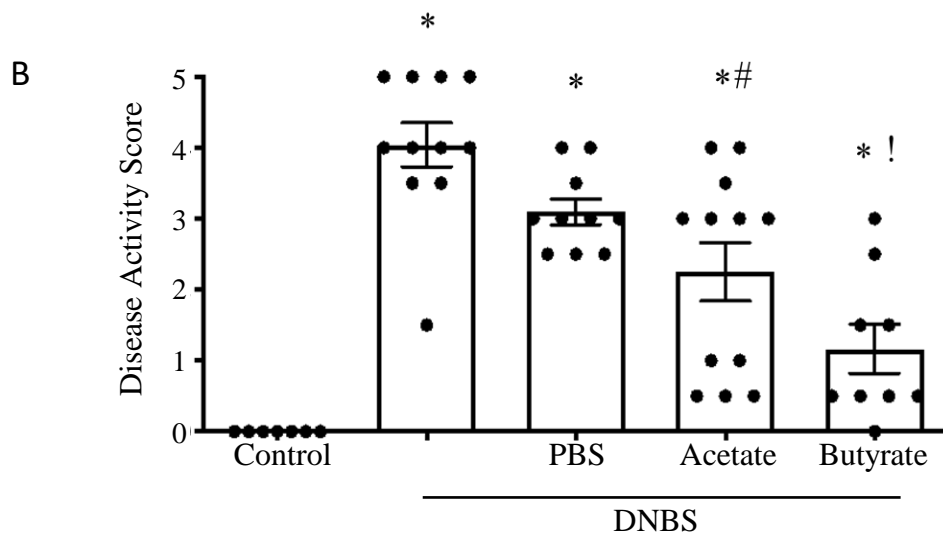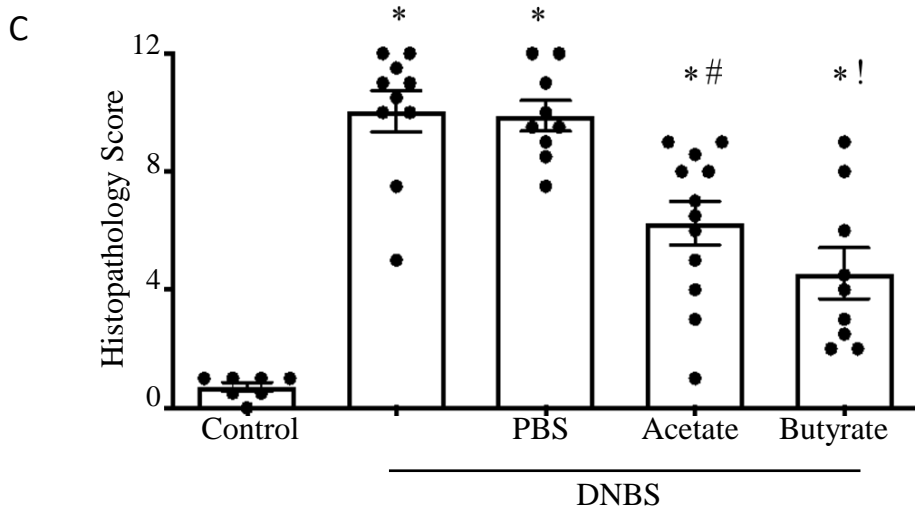

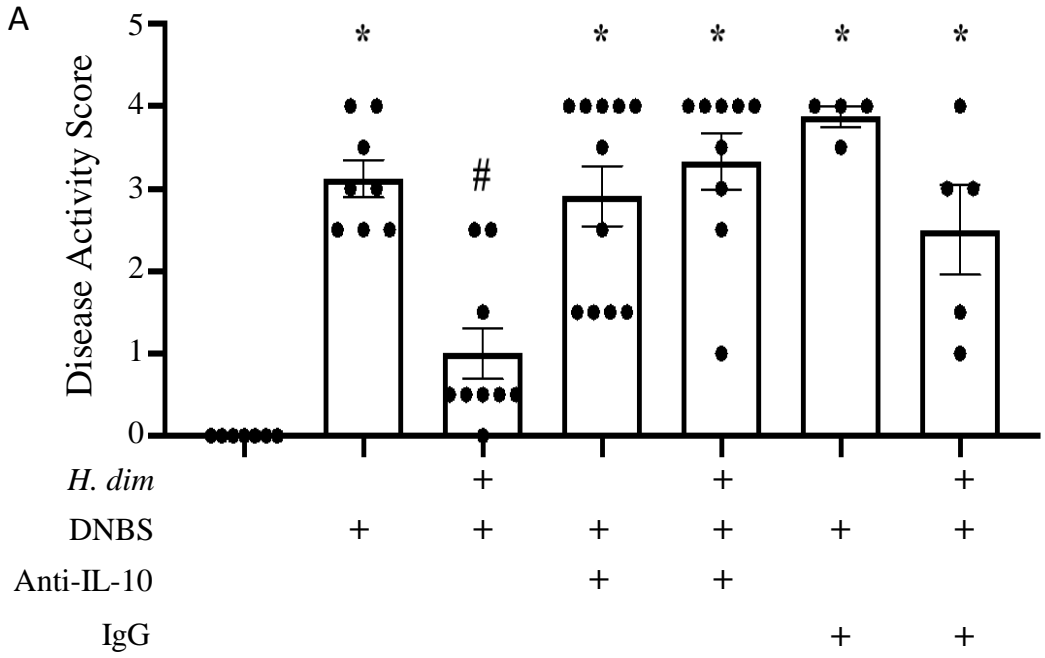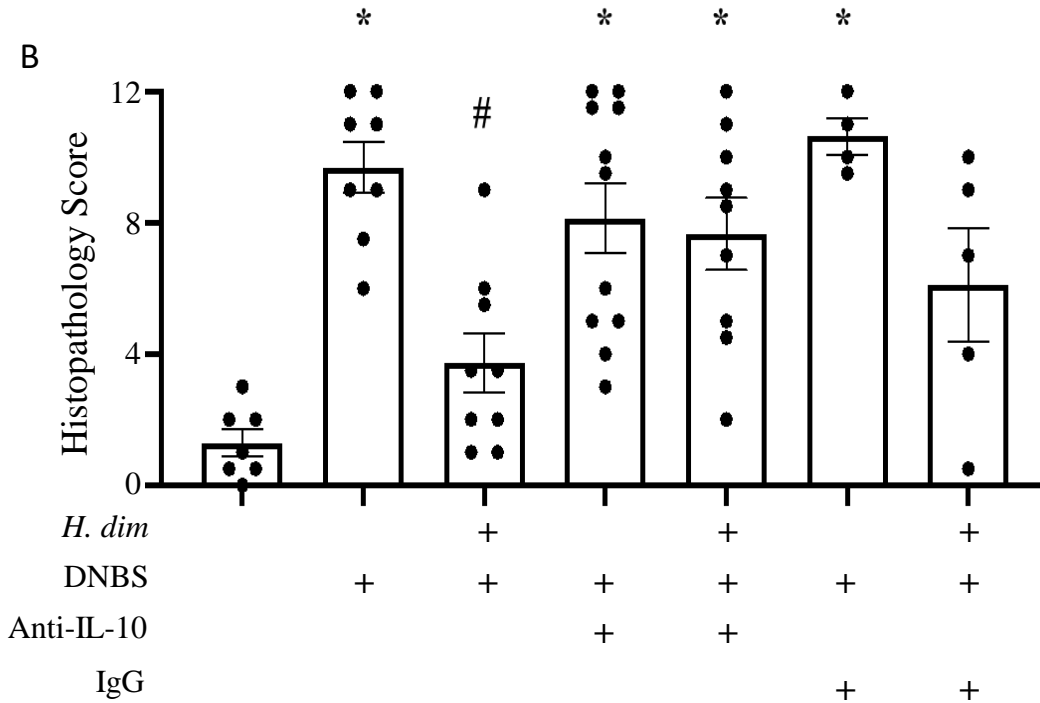

Supplement: 40168_2021_1146_MOESM1_ESM.pdf [file 40168_2021_1146_MOESM1_ESM.pdf]
